# Supplementary material for: Sinorhizobium meliloti Sigma Factors RpoE1 and RpoE4 Are Activated in Stationary Phase in Response to Sulfite
Source: PubMed Central journal article supplement (PMC3511301; doi:10.1371/journal.pone.0050768), 2012-11-30
Supplement: pone.0050768.s005.pdf [file pone.0050768.s005.pdf]

**Table S2: oligonucleotides used in this study**

| Names  | Sequences <sup>1</sup> (5'→ 3')         | Main use                                             |
|--------|-----------------------------------------|------------------------------------------------------|
| OCB588 | ACGGCGAAGATCTGTTGCAG                    | qPCR <i>rpoE1</i> (SMc01419)                         |
| OCB589 | GGTCATGATGGTGAAGGCC                     | qPCR <i>rpoE1</i> (SMc01419)                         |
| OCB590 | CAATGACGCCGACGATCTTG                    | qPCR <i>rpoE3</i> (SMc02713)                         |
| OCB591 | TCGCATAGACCCAGCTTTCC                    | qPCR <i>rpoE3</i> (SMc02713)                         |
| OCB631 | CGATCCAGATGTTCCGAAGG                    | Check pTH1703:: <i>PrpoE4-lacZ</i> genomic insertion |
| OCB637 | CCGCCAGGCAAATTCTG                       | Check insertions in pMLBAD                           |
| OCB638 | ATTAGCGGATCCTACCTG                      | Check insertions in pMLBAD                           |
| DT88   | GAAGAGAAGGTGGAAATGGCGTTTTGG             | 5' RACE                                              |
| DT89   | CCAAAACGCCATTTCCACCTTCTCTTC             | 5' RACE                                              |
| OCB722 | <u>G</u> CATGCAATAATTCTACACAGCCCAG      | Pspac                                                |
| OCB723 | <u>GCGGCCGCGGATCCGCGCTGGTACCCTCGCTC</u> | Pspac                                                |
| OCB724 | <u>CTCGAGTTTAAACTCATCTTCTCCG</u>        | <i>placI</i>                                         |
| OCB725 | <u>GCTAGCAATTGCGTTGCGCTCACTG</u>        | <i>placI</i>                                         |
| OCB752 | <u>GGATCCACCTATATCGTCGCGCAACG</u>       | <i>rpoC</i> upstream                                 |
| OCB753 | <u>TCTAGATTCCGCCGCGGGATCGTTCG</u>       | <i>rpoC</i> upstream                                 |
| OCB755 | <u>GTTTAAACGCTTCCGCCTATCAGGGCGC</u>     | <i>rpoC</i> downstream                               |
| OCB758 | GGCGACTACATCCTCGACGG                    | Check tag                                            |
| OCB759 | GGATAACGACAACGCACCCG                    | Check tag                                            |
| OCB762 | ATGCATGCGAAAGGGGAGGGTATCTG              | <i>rpoC</i> downstream                               |
| OCB794 | GTTGGAATCGCTAGTAATCGCAG                 | qPCR 16S rDNA                                        |
| OCB796 | ACCTTCGGGTAGAACCAACTC                   | qPCR 16S rDNA                                        |
| OCB907 | <u>GAATTCACCATGTCGCACGGCCCTGACGG</u>    | <i>rpoE1</i> amplification                           |
| OCB908 | <u>AAGCTTTCATTT</u> CGGTCTCCGACGGG      | <i>rpoE1</i> amplification                           |
| OCB909 | <u>GTCGACCGTGC</u> CGGTTCTGCGTTGA       | <i>rpoE1</i> upstream                                |
| OCB910 | <u>ATGCATGTCAGGGCCGTGC</u> GACATCCC     | <i>rpoE1</i> upstream                                |
| OCB911 | <u>ATGCATGCCCTGC</u> GAGACCGAAATG       | <i>rpoE1</i> downstream                              |
| OCB912 | <u>CCCGGGGCATAGATCAGGAAAGCCGA</u>       | <i>rpoE1</i> downstream                              |
| OCB915 | <u>TCTAGAGCTC</u> CACTGGCTCAAGGGGC      | <i>rpoE3</i> upstream                                |
| OCB916 | <u>ATGCATTGCTCTT</u> CCAGTCAAACGTG      | <i>rpoE3</i> upstream                                |
| OCB919 | <u>GAATTCACCATGTC</u> GGGTATCATGCGCTC   | <i>rpoE4</i> amplification                           |
| OCB920 | <u>AAGCTTTCATTTT</u> CGGCCTTCTCGAT      | <i>rpoE4</i> amplification                           |
| OCB921 | <u>GTCGACGCTCGCCATGGATCGCACCA</u>       | <i>rpoE4</i> upstream and P- <i>rpoE4</i>            |
| OCB922 | <u>ATGCATGACACCCGATCAGGGCTGCA</u>       | <i>rpoE4</i> upstream and P- <i>rpoE4</i>            |
| OCB923 | <u>ATGCATGCGCGGCATCGAGAAGGCCG</u>       | <i>rpoE4</i> downstream                              |
| OCB924 | <u>CCCGGGCGGCGTGAAGA</u> ACCTCCGA       | <i>rpoE4</i> downstream                              |
| OCB935 | CGGTTCTCGGTGTTGCGGCC                    | Check <i>rpoE1</i> deletion                          |
| OCB939 | GGACCAGCCGCGCGGAAAAC                    | Check <i>rpoE1</i> deletion                          |
| OCB942 | CCTGTGCCTGCATGTCCAGC                    | Check <i>rpoE4</i> deletion                          |
| OCB943 | CAGGCTCAGCCGACAGCCGG                    | Check <i>rpoE4</i> deletion                          |
| OCB950 | ATTCGATCGTTGAGCGAAAG                    | qPCR SMc01418                                        |
| OCB951 | CGGTAACGTCACCCATCTTC                    | qPCR SMc01418                                        |
| OCB960 | GACCGATCGTTCCTTGGATAG                   | P-SMc01418- <i>rpoE1</i>                             |
| OCB961 | GGGTTTCTCTCAAGATGTC                     | P-SMc01418- <i>rpoE1</i>                             |

|         |                                    |                                                      |
|---------|------------------------------------|------------------------------------------------------|
| OCB964  | TGATCTATGCCAGCGAAGTG               | qPCR SMc01420                                        |
| OCB965  | AAAGATCGGGGATTTTCAGC               | qPCR SMc01420                                        |
| OCB966  | AGGATACCGCACTCCATGAC               | qPCR SMc02156                                        |
| OCB967  | TTCCTTCGTCCAGACATCC                | qPCR SMc02156                                        |
| OCB968  | ATGAACGAGCATTTCGTCATC              | qPCR SMc04164                                        |
| OCB969  | GAGAGGTTCTCCAGGACACG               | qPCR SMc04164                                        |
| OCB970  | ACTGTCGCCGAAGTGAAGAC               | qPCR SMc04049                                        |
| OCB971  | ATTTTCTGGTCAACCGTCAG               | qPCR SMc04049                                        |
| OCB976  | TTGATCGGTTATGCCATTCTC              | qPCR SMc00108                                        |
| OCB977  | ACGAAGAGGTGGTGCATTTT               | qPCR SMc00108                                        |
| OCB982  | ACCTGGAACAGGAGTTTCGTC              | qPCR <i>rpoE4</i> (SMc04051)                         |
| OCB983  | AAACCGGATATGTCGACCAG               | qPCR <i>rpoE4</i> (SMc04051)                         |
| OCB991  | TCTAGACGTTGCATACAGGCTACGTC         | <i>sorT</i> upstream                                 |
| OCB992  | ATGCATGTCGCGTCTCCTTTTCCC           | <i>sorT</i> upstream                                 |
| OCB993  | ATGCATCCGCAACCGAAGGGTTCC           | <i>sorT</i> downstream                               |
| OCB994  | CCCGGGGCCGATCACTTGGCTTTTC          | <i>sorT</i> downstream                               |
| OCB995  | CTTTTGGCAGGAAGGTGACG               | Check <i>sorT</i> deletion                           |
| OCB996  | CTGGGTCCGAGGTTCTTTTC               | qPCR SMc04050                                        |
| OCB997  | CAAAGACGGGCGTCAATC                 | qPCR SMc04050                                        |
| OCB998  | <u>GGTACCTT</u> GACTGAGATGCTGACCAT | <i>sorT</i> amplification                            |
| OCB999  | <u>GCATGCTC</u> AGGCAACGGTGAGTTTGA | <i>sorT</i> amplification                            |
| OCB1002 | GTTTGAACGCGAAGACCTG                | qPCR SMc00821                                        |
| OCB1003 | TCCCCTGTAGAAGAGGTTTCG              | qPCR SMc00821                                        |
| OCB1004 | GATGGATGCTGTCGTTTGCTG              | Check <i>sorT</i> deletion                           |
| OCB1042 | GAGGATGCGGTGCATATCCTC              | Check pTH1703:: <i>PrpoE1-lacZ</i> genomic insertion |
| OCB1050 | TCCGTATCCTGCGCAATCTC               | qPCR <i>rpoE6</i> (SMa0143)                          |
| OCB1051 | GATGAACCGGCGATGTCATG               | qPCR <i>rpoE6</i> (SMa0143)                          |
| OCB1136 | CTCTGGCGGGAGCCGTTG                 | qPCR SMb21671                                        |
| OCB1137 | GGACACGACAAGCGGCTTG                | qPCR SMb21671                                        |
| KS      | TCGAGGTCGACGGTATC                  | Check insertions in pJQ200KS                         |
| SK      | CGCTCTAGAACTAGTGGATC               | Check insertions in pJQ200KS                         |
| Gus1    | TGCCACAGGCCGTCGAG                  | Check pTH1703 derivatives genomic insertion          |
| Gus Rev | TAACGCGCTTTCCACCAACGCTGATCA        | Check insertions in pTH1703                          |
| lacPCR  | AAGGGGGATGTGCTGCAAGG               | Check insertions in pTH1703                          |
| M13 -20 | GTAAAACGACGGCCAGT                  | Check insertions in pJQ200mp19 and pGEM-T            |
| M13 Rev | GGAAACAGCTATGACCAT                 | Check insertions in pJQ200mp19 and pGEM-T            |

<sup>1</sup>Bold letters represent start and stop codons. Underlined or highlighted sequences indicate restriction sites.
